# Supplementary material for: Joint Estimation of Migration Rate and Effective Population Size Using the Island Model
Source: Oxford University Press journal article supplement (doi:10.1534/genetics.107.078998), 2007-08-25
Supplement: genetics.107.078998-1.pdf [file genetics.107.078998-1.pdf]

## SUPPLEMENTAL TABLES

**Table S1** Medians (5th, 95th percentiles) of the estimates of migration rate and effective population size using genotype data simulated under the infinite island model at different values of migration rate,  $m$ , and effective population size,  $N$ , based on 400 replicate simulations for each pair of model migration rate and effective population size parameters for dioecious and monoecious model populations.

| Parameter Estimates                      |      |                       |                |           |                |                        |                |           |                |
|------------------------------------------|------|-----------------------|----------------|-----------|----------------|------------------------|----------------|-----------|----------------|
| Median (5th Percentile, 95th Percentile) |      |                       |                |           |                |                        |                |           |                |
| Parameter                                |      | Dioecious Populations |                |           |                | Monoecious Populations |                |           |                |
| Values                                   |      |                       |                |           |                |                        |                |           |                |
| $N$                                      | $m$  | $\hat{m}$             |                | $\hat{N}$ |                | $\hat{m}$              |                | $\hat{N}$ |                |
| 10                                       | 0.02 | 0.019                 | (0.013, 0.027) | 9.91      | (7.80, 13.22)  | 0.019                  | (0.014, 0.027) | 9.73      | (8.16, 12.46)  |
|                                          | 0.05 | 0.050                 | (0.036, 0.064) | 9.87      | (8.38, 12.24)  | 0.049                  | (0.038, 0.062) | 9.86      | (8.66, 12.02)  |
|                                          | 0.10 | 0.098                 | (0.076, 0.125) | 9.98      | (8.57, 12.10)  | 0.101                  | (0.079, 0.123) | 9.92      | (8.67, 11.53)  |
|                                          | 0.20 | 0.200                 | (0.158, 0.248) | 9.96      | (8.76, 11.88)  | 0.199                  | (0.162, 0.244) | 10.05     | (8.90, 11.29)  |
| 20                                       | 0.02 | 0.019                 | (0.012, 0.028) | 19.62     | (15.04, 30.07) | 0.019                  | (0.012, 0.027) | 19.78     | (15.33, 29.79) |

|    |      |                      |                      |                      |                      |
|----|------|----------------------|----------------------|----------------------|----------------------|
|    | 0.05 | 0.050 (0.035, 0.067) | 19.70 (15.41, 26.41) | 0.051 (0.035, 0.066) | 19.58 (15.48, 26.91) |
|    | 0.10 | 0.100 (0.068, 0.132) | 19.88 (15.95, 27.61) | 0.099 (0.073, 0.128) | 20.11 (16.38, 25.50) |
|    | 0.20 | 0.202 (0.152, 0.262) | 19.77 (16.47, 25.14) | 0.199 (0.147, 0.258) | 20.04 (16.36, 25.14) |
| 50 | 0.02 | 0.019 (0.005, 0.032) | 51.39 (30.95, 172.5) | 0.019 (0.005, 0.033) | 50.90 (30.23, 165.7) |
|    | 0.05 | 0.049 (0.023, 0.079) | 50.11 (32.71, 103.3) | 0.050 (0.023, 0.076) | 49.67 (33.23, 107.9) |
|    | 0.10 | 0.098 (0.053, 0.156) | 50.59 (33.93, 91.65) | 0.101 (0.052, 0.156) | 49.53 (32.80, 91.62) |
|    | 0.20 | 0.194 (0.090, 0.322) | 50.18 (33.46, 101.9) | 0.200 (0.095, 0.322) | 49.66 (34.20, 95.17) |

---

**Table S2** Medians (5th, 95th percentiles) of the estimates of mutation rate, migration rate and effective population size using genotype data simulated under the finite island model with the  $k$ -allele mutation model at different values of mutation rate,  $u$ , migration rate,  $m$ , and effective population size,  $N$ , based on 400 replicate simulations for each pair of model migration rate and effective population size parameters for dioecious ( $u=0.001$ ,  $u=0.0005$ , and  $u=0.0001$ ) and monoecious ( $u=0.0005$ ) model populations.

|                  |      |                       | Parameter Estimates                                          |  |                      |
|------------------|------|-----------------------|--------------------------------------------------------------|--|----------------------|
|                  |      |                       | Median (5th Percentile, 95th Percentile)                     |  |                      |
| Parameter Values |      |                       | Dioecious Populations: $k$ -allele Mutation Model; $u=0.001$ |  |                      |
| $N$              | $m$  | $\hat{u} \times 10^3$ | $\hat{m}$                                                    |  | $\hat{N}$            |
| 10               | 0.02 | 0.993 (0.693, 1.343)  | 0.019 (0.013, 0.027)                                         |  | 9.97 (8.36, 12.53)   |
|                  | 0.05 | 1.007 (0.707, 1.339)  | 0.049 (0.037, 0.064)                                         |  | 9.95 (8.56, 11.89)   |
|                  | 0.10 | 1.001 (0.715, 1.355)  | 0.099 (0.075, 0.127)                                         |  | 10.02 (8.84, 12.01)  |
| 20               | 0.02 | 1.003 (0.716, 1.425)  | 0.201 (0.155, 0.260)                                         |  | 10.02 (8.60, 11.80)  |
|                  | 0.05 | 1.005 (0.675, 1.348)  | 0.020 (0.014, 0.026)                                         |  | 20.09 (15.83, 26.87) |
|                  | 0.10 | 0.999 (0.682, 1.358)  | 0.049 (0.037, 0.064)                                         |  | 20.08 (16.47, 26.93) |
|                  | 0.10 | 0.988 (0.697, 1.411)  | 0.098 (0.073, 0.131)                                         |  | 20.10 (16.20, 26.13) |

|    |      |                      |                      |                      |
|----|------|----------------------|----------------------|----------------------|
|    | 0.20 | 1.005 (0.732, 1.371) | 0.202 (0.152, 0.257) | 19.92 (16.72, 24.95) |
| 50 | 0.02 | 0.989 (0.523, 1.507) | 0.019 (0.011, 0.029) | 50.83 (35.17, 88.58) |
|    | 0.05 | 1.024 (0.560, 1.490) | 0.051 (0.028, 0.071) | 48.97 (35.46, 85.56) |
|    | 0.10 | 1.002 (0.571, 1.496) | 0.101 (0.057, 0.149) | 49.94 (35.39, 82.39) |
|    | 0.20 | 0.971 (0.569, 1.524) | 0.196 (0.112, 0.305) | 50.82 (35.10, 83.54) |

---

Parameter Values

Dioecious Populations:  $k$ -allele Mutation Model;  $u=0.0005$

| $N$ | $m$  | $\hat{u} \times 10^4$ | $\hat{m}$            | $\hat{N}$            |
|-----|------|-----------------------|----------------------|----------------------|
| 10  | 0.02 | 4.937 (3.299, 7.462)  | 0.019 (0.014, 0.028) | 10.09 (8.12, 12.76)  |
|     | 0.05 | 4.910 (3.217, 7.129)  | 0.050 (0.036, 0.066) | 10.07 (8.33, 12.77)  |
|     | 0.10 | 5.004 (3.301, 6.880)  | 0.099 (0.073, 0.134) | 9.98 (8.34, 12.63)   |
|     | 0.20 | 5.100 (3.287, 7.125)  | 0.200 (0.144, 0.270) | 9.89 (8.50, 12.52)   |
| 20  | 0.02 | 5.038 (3.355, 7.123)  | 0.020 (0.014, 0.026) | 19.97 (15.30, 27.83) |
|     | 0.05 | 4.925 (3.302, 7.261)  | 0.049 (0.035, 0.067) | 20.36 (15.86, 27.48) |
|     | 0.10 | 5.063 (3.413, 7.004)  | 0.102 (0.074, 0.134) | 19.68 (15.84, 26.26) |
|     | 0.20 | 4.914 (3.413, 7.067)  | 0.198 (0.145, 0.265) | 19.86 (16.50, 25.72) |

|    |      |                      |                      |                      |
|----|------|----------------------|----------------------|----------------------|
| 50 | 0.02 | 5.018 (2.529, 8.093) | 0.020 (0.010, 0.030) | 49.36 (33.45, 98.02) |
|    | 0.05 | 4.825 (2.659, 7.790) | 0.049 (0.027, 0.073) | 50.80 (35.54, 87.53) |
|    | 0.10 | 5.169 (2.664, 7.988) | 0.103 (0.053, 0.156) | 49.07 (34.05, 89.98) |
|    | 0.20 | 5.034 (2.521, 7.748) | 0.199 (0.098, 0.314) | 49.98 (34.53, 92.92) |

---

Parameter Values

Dioecious Populations:  $k$ -allele Mutation Model;  $u=0.0001$

| $N$ | $m$  | $\hat{u} \times 10^4$ | $\hat{m}$            | $\hat{N}$            |
|-----|------|-----------------------|----------------------|----------------------|
| 10  | 0.02 | 0.970 (0.423, 1.677)  | 0.019 (0.010, 0.028) | 9.94 (7.59, 16.63)   |
|     | 0.05 | 0.964 (0.462, 1.784)  | 0.049 (0.027, 0.080) | 10.08 (7.22, 15.90)  |
|     | 0.10 | 0.969 (0.422, 1.781)  | 0.099 (0.058, 0.155) | 10.10 (7.42, 15.31)  |
|     | 0.20 | 0.962 (0.354, 1.734)  | 0.200 (0.105, 0.327) | 9.97 (7.47, 15.78)   |
| 20  | 0.02 | 0.977 (0.444, 1.610)  | 0.019 (0.010, 0.030) | 19.68 (13.78, 35.61) |
|     | 0.05 | 0.981 (0.448, 1.705)  | 0.051 (0.024, 0.079) | 19.46 (13.41, 39.72) |
|     | 0.10 | 0.959 (0.416, 1.628)  | 0.099 (0.051, 0.161) | 20.34 (13.76, 36.63) |
|     | 0.20 | 1.025 (0.446, 1.824)  | 0.198 (0.106, 0.339) | 19.92 (13.19, 35.27) |
| 50  | 0.02 | 0.919 (0.096, 1.809)  | 0.018 (0.002, 0.034) | 53.17 (29.94, 447.1) |

|      |       |                |       |                |       |                |
|------|-------|----------------|-------|----------------|-------|----------------|
| 0.05 | 0.960 | (0.178, 1.790) | 0.049 | (0.009, 0.093) | 51.28 | (29.42, 260.3) |
| 0.10 | 1.015 | (0.227, 1.893) | 0.099 | (0.023, 0.184) | 49.42 | (29.29, 193.5) |
| 0.20 | 0.933 | (0.250, 1.736) | 0.191 | (0.056, 0.374) | 51.81 | (31.04, 172.7) |

---

Parameter Values

Monoecious Populations:  $k$ -allele Mutation Model;  $u=0.0005$

| $N$ | $m$  | $\hat{u} \times 10^4$ | $\hat{m}$            | $\hat{N}$            |
|-----|------|-----------------------|----------------------|----------------------|
| 10  | 0.02 | 4.965 (3.299, 6.878)  | 0.019 (0.014, 0.026) | 10.07 (8.69, 12.34)  |
|     | 0.05 | 4.998 (3.319, 7.078)  | 0.050 (0.037, 0.063) | 10.03 (8.69, 11.84)  |
|     | 0.10 | 5.043 (3.462, 7.191)  | 0.101 (0.077, 0.127) | 9.95 (8.71, 11.99)   |
|     | 0.20 | 5.046 (3.356, 7.129)  | 0.198 (0.151, 0.260) | 10.08 (8.77, 11.84)  |
| 20  | 0.02 | 4.985 (3.266, 7.065)  | 0.020 (0.013, 0.027) | 19.83 (15.65, 27.23) |
|     | 0.05 | 4.911 (3.406, 6.875)  | 0.049 (0.037, 0.063) | 20.14 (16.32, 26.56) |
|     | 0.10 | 4.989 (3.367, 7.115)  | 0.101 (0.072, 0.133) | 19.73 (16.26, 25.84) |
|     | 0.20 | 4.836 (3.499, 7.004)  | 0.196 (0.143, 0.266) | 20.17 (16.13, 26.19) |
| 50  | 0.02 | 5.108 (2.216, 7.818)  | 0.020 (0.009, 0.030) | 49.68 (33.53, 110.1) |
|     | 0.05 | 4.760 (2.513, 7.469)  | 0.047 (0.026, 0.075) | 52.17 (34.65, 93.40) |

|      |                      |                      |                      |
|------|----------------------|----------------------|----------------------|
| 0.10 | 4.960 (2.557, 7.631) | 0.099 (0.050, 0.151) | 50.36 (34.50, 94.46) |
| 0.20 | 4.863 (2.877, 7.566) | 0.201 (0.113, 0.309) | 50.55 (35.33, 84.27) |

---

**Table S3** Medians (5th, 95th percentiles) of the estimates of mutation rate, migration rate and effective population size using genotype data combined over loci having 4, 8, and 12 alleles simulated under the finite island model with the  $k$ -allele mutation model ( $u=0.0005$ ) at different values of migration rate,  $m$ , and effective population size,  $N$ , based on 400 replicate simulations for each pair of model migration rate and effective population size parameters for dioecious model populations.

| Parameter Values |      |                       | Parameter Estimates                                           |  |                      |
|------------------|------|-----------------------|---------------------------------------------------------------|--|----------------------|
|                  |      |                       | Median (5th Percentile, 95th Percentile)                      |  |                      |
| Parameter Values |      |                       | Dioecious Populations: $k$ -Allele Mutation Model; $u=0.0005$ |  |                      |
| $N$              | $m$  | $\hat{u} \times 10^4$ | $\hat{m}$                                                     |  | $\hat{N}$            |
| 10               | 0.02 | 5.016 (3.588, 7.062)  | 0.020 (0.015, 0.024)                                          |  | 9.90 (8.37, 12.39)   |
|                  | 0.05 | 4.981 (3.257, 7.204)  | 0.049 (0.038, 0.061)                                          |  | 10.25 (8.31, 12.52)  |
|                  | 0.10 | 5.013 (3.401, 7.237)  | 0.100 (0.078, 0.123)                                          |  | 10.09 (8.67, 12.14)  |
| 20               | 0.02 | 4.910 (3.194, 7.061)  | 0.206 (0.155, 0.262)                                          |  | 10.01 (8.35, 12.02)  |
|                  | 0.05 | 5.026 (3.390, 7.109)  | 0.020 (0.015, 0.026)                                          |  | 19.44 (15.51, 25.84) |
|                  | 0.10 | 5.285 (3.559, 7.418)  | 0.050 (0.037, 0.063)                                          |  | 19.66 (16.17, 26.39) |
|                  | 0.10 | 5.089 (3.214, 7.104)  | 0.098 (0.070, 0.127)                                          |  | 20.18 (16.08, 27.33) |



|    |      |                      |                      |                      |
|----|------|----------------------|----------------------|----------------------|
|    | 0.20 | 5.121 (3.279, 7.096) | 0.195 (0.146, 0.264) | 20.15 (16.20, 26.23) |
| 50 | 0.02 | 4.957 (2.379, 7.999) | 0.018 (0.009, 0.029) | 53.50 (34.16, 106.6) |
|    | 0.05 | 5.668 (3.098, 8.570) | 0.054 (0.029, 0.080) | 45.89 (32.17, 82.82) |
|    | 0.10 | 5.089 (2.725, 7.950) | 0.096 (0.055, 0.142) | 51.16 (36.29, 85.76) |
|    | 0.20 | 4.579 (2.402, 7.472) | 0.193 (0.096, 0.299) | 51.26 (35.46, 93.41) |

---

**Table S4** Medians (5th, 95th percentiles) of the estimates of mutation rate, migration rate and effective population size using genotype data simulated under the finite island model with stepwise mutation models (employing either unbounded or bounded ranges in allele lengths;  $u=0.0005$ ) at different values of migration rate,  $m$ , and effective population size,  $N$ , based on 400 replicate simulations for each pair of model migration rate and effective population size parameters for dioecious model populations.

| Parameter Values |      | Parameter Estimates                                                  |                      |                      |
|------------------|------|----------------------------------------------------------------------|----------------------|----------------------|
|                  |      | Median (5th Percentile, 95th Percentile)                             |                      |                      |
|                  |      | Dioecious Populations: Unbounded Stepwise Mutation Model; $u=0.0005$ |                      |                      |
| $N$              | $m$  | $\hat{u} \times 10^4$                                                | $\hat{m}$            | $\hat{N}$            |
| 10               | 0.02 | 3.712 (2.619, 5.420)                                                 | 0.020 (0.014, 0.028) | 10.00 (8.02, 13.15)  |
|                  | 0.05 | 3.967 (2.778, 5.719)                                                 | 0.049 (0.036, 0.067) | 9.90 (8.21, 12.62)   |
|                  | 0.10 | 4.062 (2.839, 5.709)                                                 | 0.100 (0.073, 0.130) | 10.06 (8.38, 12.94)  |
| 20               | 0.02 | 4.189 (2.862, 6.108)                                                 | 0.197 (0.152, 0.268) | 10.06 (8.36, 12.26)  |
|                  | 0.05 | 3.600 (2.385, 4.965)                                                 | 0.020 (0.013, 0.028) | 19.79 (15.21, 28.11) |
|                  | 0.10 | 3.619 (2.477, 5.082)                                                 | 0.050 (0.034, 0.066) | 20.25 (15.75, 27.49) |
|                  | 0.10 | 3.782 (2.431, 5.253)                                                 | 0.100 (0.068, 0.139) | 19.79 (15.37, 27.77) |

|    |      |                      |                      |                      |
|----|------|----------------------|----------------------|----------------------|
|    | 0.20 | 3.798 (2.431, 5.489) | 0.202 (0.136, 0.278) | 19.91 (15.87, 28.06) |
| 50 | 0.02 | 2.898 (1.316, 4.757) | 0.020 (0.009, 0.031) | 51.23 (32.43, 107.5) |
|    | 0.05 | 2.987 (1.256, 4.635) | 0.050 (0.021, 0.081) | 50.22 (32.39, 107.9) |
|    | 0.10 | 2.989 (1.551, 4.710) | 0.099 (0.050, 0.157) | 49.99 (33.79, 97.39) |
|    | 0.20 | 3.066 (1.492, 4.841) | 0.198 (0.092, 0.333) | 50.63 (33.15, 108.2) |

---

Parameter Values

Dioecious Populations: Bounded Stepwise Mutation Model;  $u=0.0005$

| $N$ | $m$  | $\hat{u} \times 10^4$ | $\hat{m}$            | $\hat{N}$            |
|-----|------|-----------------------|----------------------|----------------------|
| 10  | 0.02 | 3.409 (2.254, 5.292)  | 0.020 (0.013, 0.027) | 9.95 (7.88, 13.48)   |
|     | 0.05 | 3.629 (2.416, 5.248)  | 0.050 (0.036, 0.068) | 9.94 (8.25, 12.93)   |
|     | 0.10 | 3.567 (2.287, 5.382)  | 0.098 (0.070, 0.132) | 10.12 (8.38, 12.67)  |
|     | 0.20 | 3.731 (2.335, 5.678)  | 0.202 (0.145, 0.264) | 9.97 (8.31, 12.78)   |
| 20  | 0.02 | 3.286 (1.967, 4.810)  | 0.020 (0.013, 0.029) | 19.73 (14.78, 30.14) |
|     | 0.05 | 3.286 (2.003, 4.862)  | 0.049 (0.032, 0.069) | 20.22 (15.63, 30.07) |
|     | 0.10 | 3.275 (2.040, 4.765)  | 0.098 (0.067, 0.131) | 20.50 (16.32, 28.28) |
|     | 0.20 | 3.306 (1.968, 5.042)  | 0.197 (0.129, 0.286) | 20.22 (15.31, 29.01) |

|    |      |                      |                      |                      |
|----|------|----------------------|----------------------|----------------------|
| 50 | 0.02 | 2.652 (1.183, 4.584) | 0.019 (0.008, 0.032) | 53.26 (32.71, 119.4) |
|    | 0.05 | 2.913 (1.302, 4.879) | 0.049 (0.022, 0.079) | 50.76 (32.76, 107.3) |
|    | 0.10 | 2.870 (1.335, 4.794) | 0.099 (0.046, 0.170) | 49.30 (30.98, 106.0) |
|    | 0.20 | 2.861 (1.224, 4.730) | 0.203 (0.092, 0.327) | 50.36 (33.12, 103.7) |

---
